# Supplementary material
Source: publisher figshare collection journal article supplement (https://gsajournals.figshare.com/ndownloader/files/16442870)
Supplement: Supplementary file 1 [file 16442870]

**Table S2. Primers used in this study**

| **Primer name** | **Primer sequence** |
| --- | --- |
| **ChIP analysis at HO-induced and native telomeres** | |
| TG-HO For | 5’- CTCCACAATCAATTGCGAGAAGCC - 3’ |
| TG-HO Rev | 5’- ACAGATGCGCCAGCGAAAGATG - 3’ |
| HO For | 5’- GGGGCTACTTTTGTCCTGTCAC - 3’ |
| HO Rev | 5’- GGGTGGGGACCATCGAAGTG - 3’ |
| VI-R For | 5’- GCCATTTCCGTGTGTAGTGA - 3’ |
| VI-R Rev | 5’- GTACGCACACGTATGCTAAAGT - 3’ |
| ARO For | 5’- TGAGTCGTTACAAGGTGATGCC - 3’ |
| ARO Rev | 5’- ACCTACAGGAGGACCCGAAA - 3’ |
| **QAOS** | |
| X Tag | 5’- AAGGAGCGCAGCGCCTGTACCA - 3’ |
| X tagging | 5’- AAGGAGCGCAGCGCCTGTACCACATTTTAATATCT - 3’ |
| X Rev | 5’- ATTGAGTGGATAGTAGATGGTGAAAAAGTGGTATAACG - 3’ |
| PAC2 For | 5’- AATAACGAATTGAGCTATGACACCAA - 3’ |
| PAC2 Rev | 5’- AGCTTACTCATATCGATTTCATACGACTT - 3’ |
